# Supplementary material
Source: PubMed Central journal article supplement (PMC6682463)

Figure S1

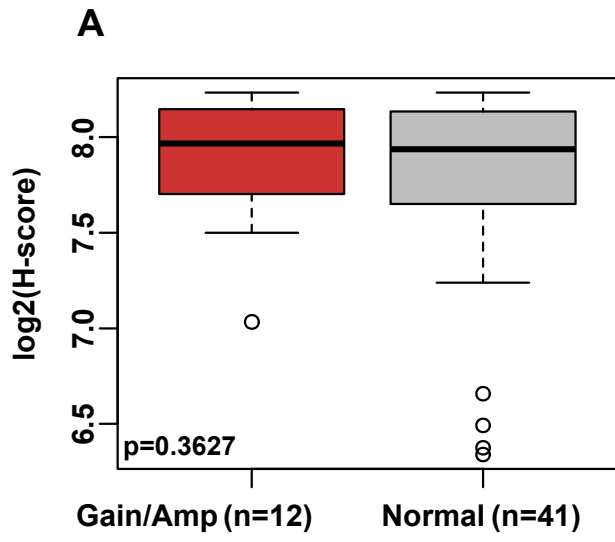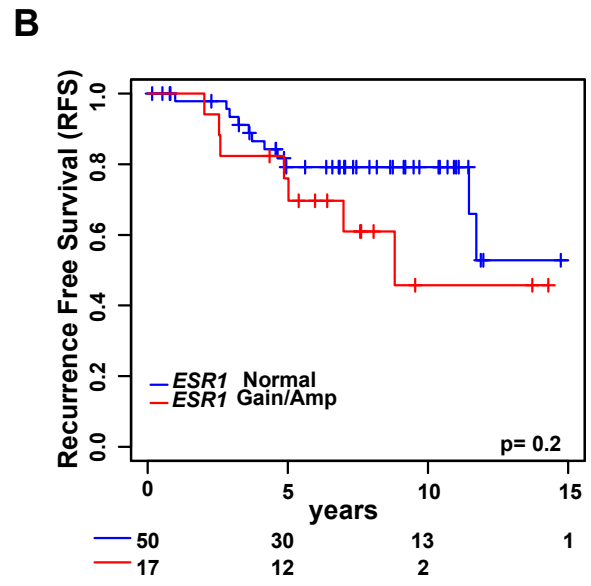



Figure S3

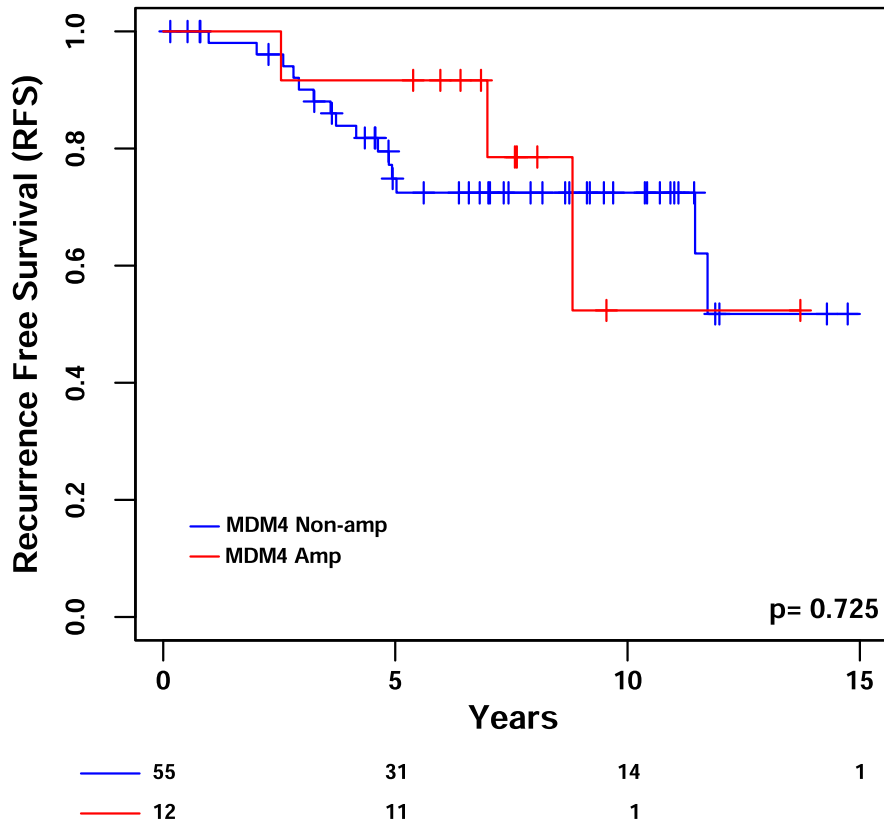

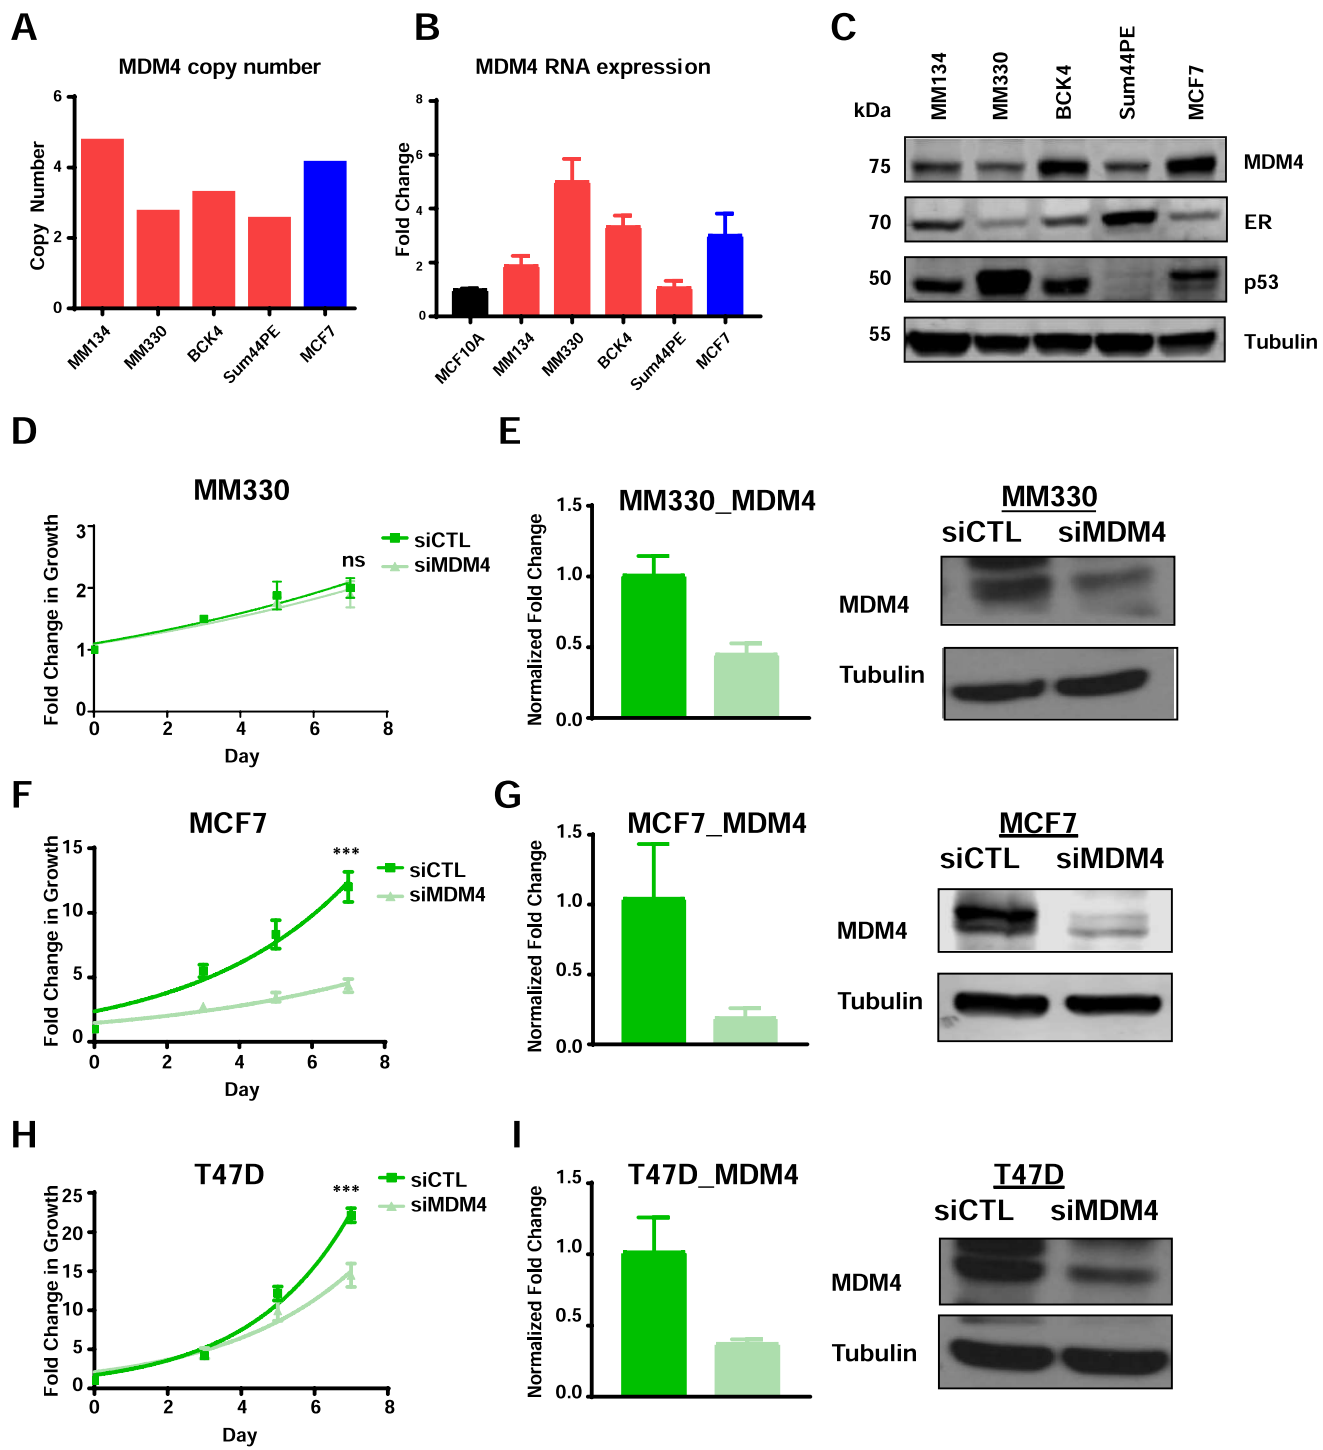

Figure S4

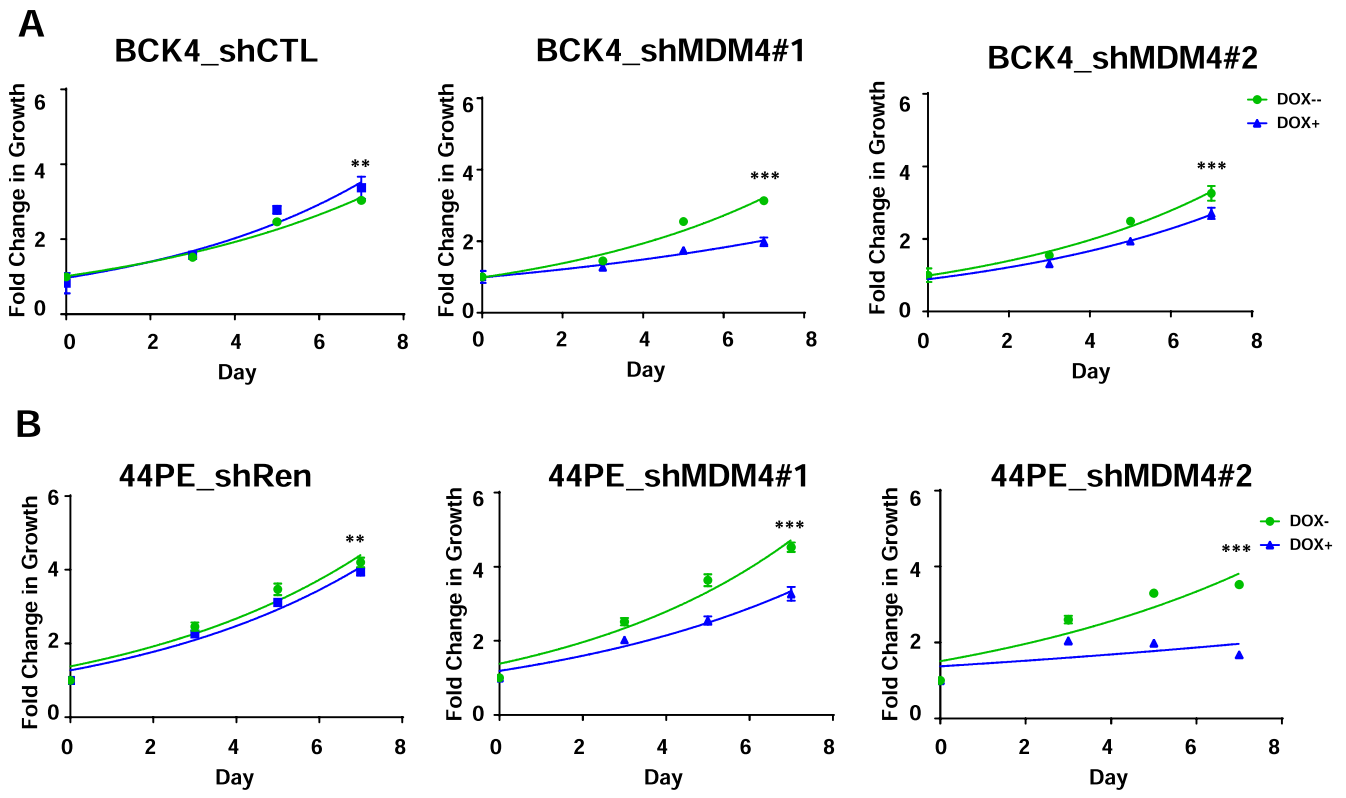

Figure S5

**A**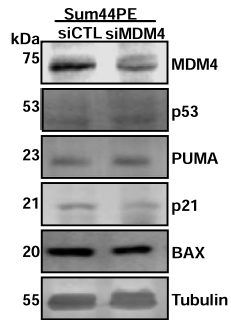**B**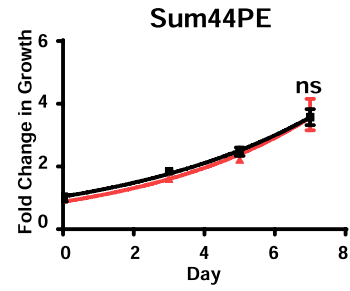**C**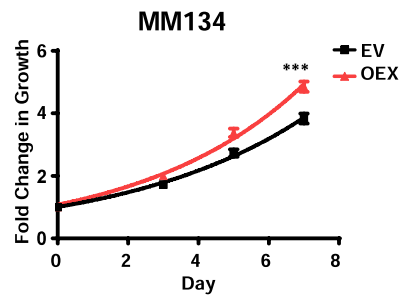**D**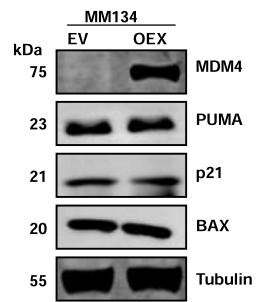

Figure S6

Supplement: NIHMS1532380-supplement-1.pdf [file NIHMS1532380-supplement-1.pdf]
